# Supplementary material
Source: Springer Nature journal article supplement (https://www.springermedizin.de/resource/supplementary/12993_2010_273_MOESM2_ESM.pdf/9617432)

## Effect of instruction

### on MD-RT

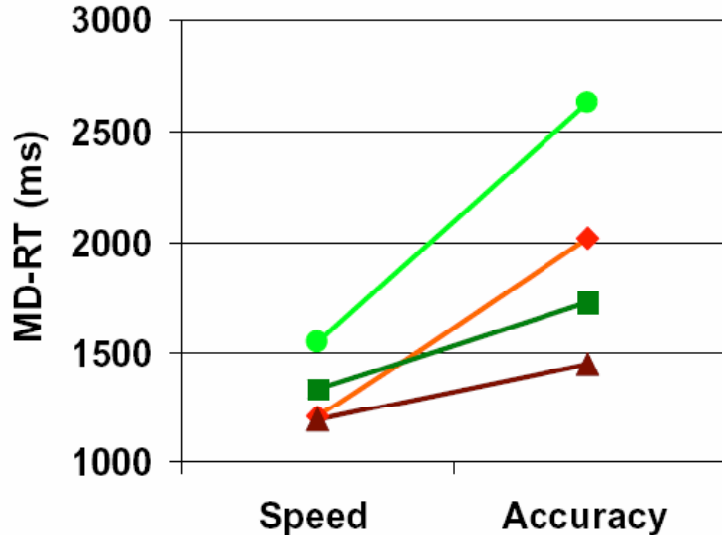

### on errors

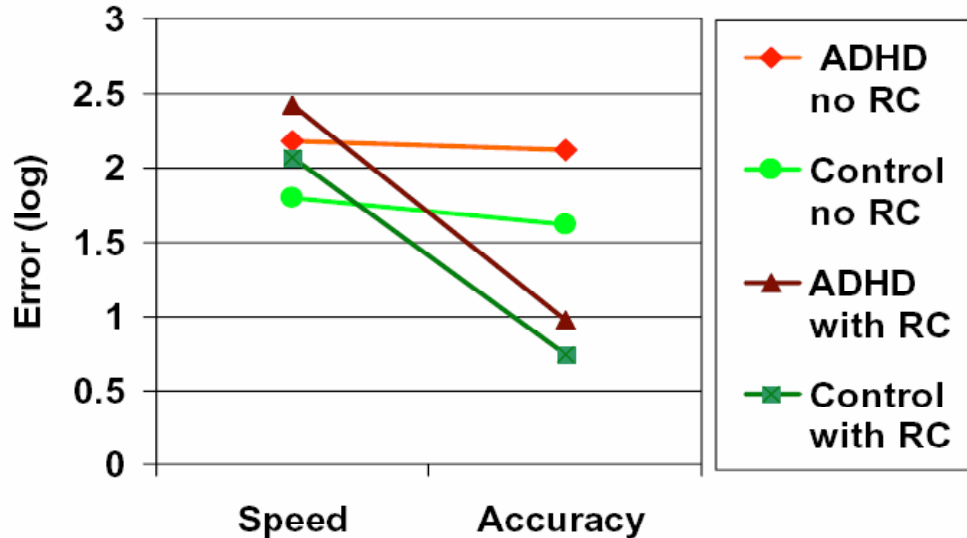

## Effect of response cost

### on MD-RT

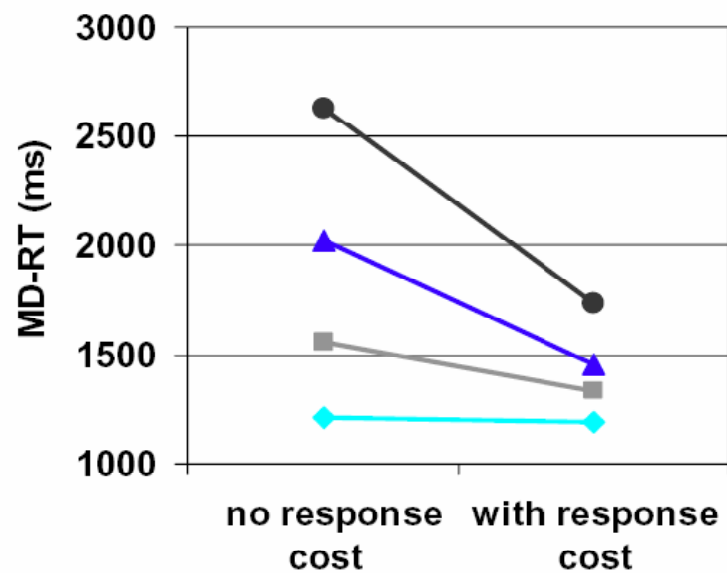

### on errors

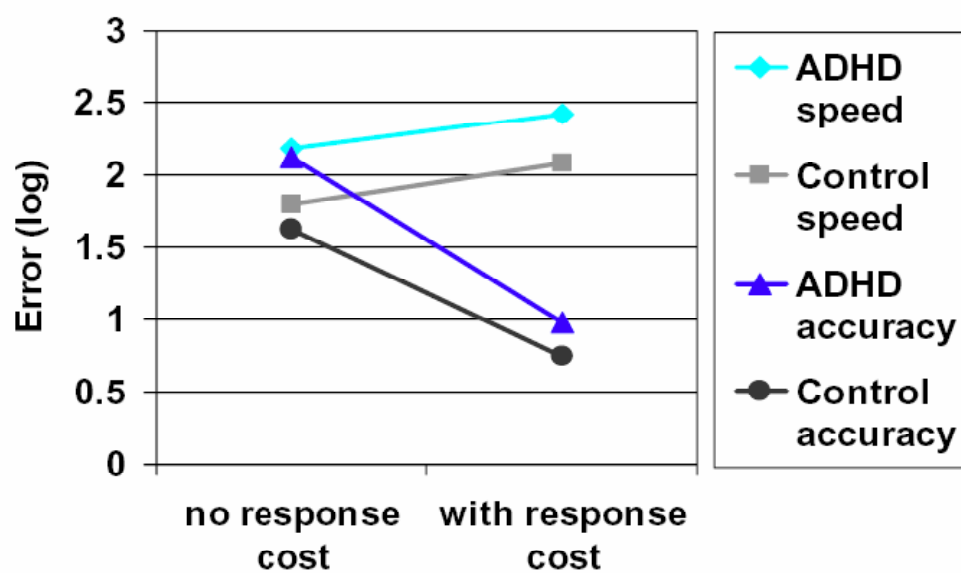

Supplement: MOESM2 [file 9617432]
